# Supplementary material for: Colossal and Reversible Barocaloric Effect in Phase Change Materials n-Alkanes
Source: Research Square preprint supplement (doi:10.21203/rs.3.rs-257277/v1), 2021-05-06
Supplement: Supplementary file 1 [file 75aab1d3d4518d817b2739a9.docx]

**Supplementary Information**

**Colossal and Reversible Barocaloric Effect in Phase Change Materials *n*-Alkanes**

**This PDF file includes:**

Supplementary Notes 1-2

Supplementary Figures 1-11

Supplementary References

**Supplementary Note 1. About the distorted exothermic/endothermic peak in the temperature-dependent *T*(t) curves.**

For the present higher *n*-alkanes, applying pressure pushes the *T*LS to higher temperatures. So, lowering temperature or applying pressure stabilizes the solid state, while raising the temperature or releasing pressure favors the liquid state.

At temperature slightly higher than *T*LS (Fig. 1B), applying pressure favors the solid state, and thus the liquid to solid transition is rapid. The corresponding exothermic peak is thus sharp and tall. However, although releasing pressure would cause the solid to liquid transition, the low-temperature does favor the solid state. Thus, the solid to liquid transition during the pressure releasing process is not as sharp as the liquid to solid transition caused by pressure applying, accordingly the endothermic peak is distorted into a short peak and a broad tail.

At temperature much higher than *T*LS (Fig. 1C), releasing pressure in the solid state is favorable to the liquid state, which gives rise to a rapid solid to liquid phase transition. On the contrary, pressure loading fails to get a rapid liquid to solid transition since the liquid state is more stable than the solid one at high temperatures. As a result, the exothermic peak (corresponding to liquid to solid transition) in the *T*(t) is distorted (a small peak plus a long tail), while the endothermic peak (corresponding to solid to liquid transition) is tall and sharp.

In the solid state (e.g., at 294 K for C18H38 in Fig. 1C), pressure is not able to introduce any phase transitions, so both the endothermic and exothermic peaks in the *T-t* curves have the single peak with similar shapes. Only at high pressures, e.g., 500 MPa, the endothermic peak is slightly sharper than exothermic one, because the pressure releasing process is more rapid than the pressure applying one.

Since the testing apparatus cannot be fully insulated, the long exothermic/endothermic time will significantly lower the adiabatic temperature change, |Δ*T*d|. For the sake of accuracy, the measured |Δ*T*d| value will be ignored when the exothermic/endothermic time takes more than 60s here. Additionally, the rate of pressure change, which determines how fast the pressure is changed, will also affect the |Δ*T*d| value and the pressure-releasing process is more rapid than the pressure-applying process. In the following cases, the |Δ*T*d| values corresponding to the pressure-applying process were ignored: 1) the *n*-alkanes lie in solid state; 2) the *n*-alkanes lie in liquid state and the applied pressure is lower than the critical value.

**Supplementary Note 2. Why the pressure induced entropy change present in manuscript was underestimated?**

According to the DTA result and heat capacity under ambient pressure, the actual total entropy under 0.1MPa can be calculated, which was shown as the black solid circle curve in Supplementary Fig. 9A. The heat capacity data under pressures not available, and the measurement is hard. So, a rough total entropy was estimated in this manuscript based on the DTA curve under P and heat capacity under 0.1MPa, which was shown as the red solid triangle curve in Supplementary Fig. 9A.

The MD calculation shows that the same pressure can induce more significant configuration change in liquid state than in solid state, indicating that a larger pressure-induced entropy change in liquid state (|Δ*S*L(T, P)|) than that in solid state (|Δ*S*s(T, P)|). So, |Δ*S*s(T, P)| is larger than zero but much smaller than |Δ*S*L(T, P)|, meaning |Δ*S*LS| will decrease with increasing pressure. It is consistent with the experimental evolution. Meanwhile, compared with the rough total entropy used in the manuscript (red solid triangle curve), the real total entropy (the gray rectangle line) will be moved down (Supplementary Fig. 9A).

Based on the above discussion, it can be clearly seen that the magnititude of |Δ*S*s(T, P)| was underestimated because the effect of pressure on the heat capacity was ignored, and the pressure induced entropy change accepted in manuscript (red solid triangle curve) is clearly smaller than the real value (the gray rectangle line) (Supplementary Fig. 9b). Consequently, the overall pressure-induced entropy change was underestimated for the current *n*-alkanes samples.

**

**

**Supplementary Figure 1.** **The adiabatic temperature change, Δ*T*d, for C18H38 measured by direct method.** The Δ*T*d values corresponding to different pressures applied at 356K, 336K and 315K (A), 305K and 294K (B), respectively. (C) The time spent in the complete exothermic (corresponding to pressure-applying, right panel) and endothermic (corresponding to pressure-releasing, left panel) processes at different temperatures.

**

**

**Supplementary Figure 2. The adiabatic temperature change, Δ*T*d, for C16H36 measured by direct method.** The Δ*T*d values corresponding to different pressures applied at 342 K, 336 K and 329 K (A), 320 K, 313 K and 305 K (B), 295 K and 286 K (C) respectively. (D) The time spent in the complete exothermic (corresponding to pressure-applying, right panel) and endothermic (corresponding to pressure-releasing, left panel) processes at different temperatures.

**

**

**Supplementary Figure 3. The adiabatic temperature change, Δ*T*d, for C14H30 measured by direct method.** The Δ*T*d value corresponding to different pressure applied at 349 K, 322 K and 307 K (A), 299 K and 290 K (B) respectively. (C) The time spent in the complete exothermic (corresponding to pressure-applying, right panel) and endothermic (corresponding to pressure-releasing, left panel) processes at different temperatures. (D) All reliable Δ*T*d values for C14H30.

**

**

**Supplementary Figure 4. Calorimetric heat flow curves ((1/*T*) (d*Q*/d*T*)-T) for C18H38 and C16H34.** (A) The (1/*T*) (d*Q*/d*T*)-T curves under ambient pressure for C18H38 measured on heating and cooling runs. Inset: The entropy change Δ*S*LS around the first-order phase transition derived from the heat flow curves. (B) The (1/*T*) (d*Q*/d*T*)-T curves for C16H34 measured on heating and cooling runs. Inset: The entropy change Δ*S*LS around the first-order phase transition derived from the heat flow curves.





**Supplementary Figure 5. The temperature dependent DTA curves under different pressures for C18H38 and C16H34.** (A) The temperature dependent DTA curves of C18H38 under different pressures measured on heating and cooling runs. Inset: The peak temperature under different pressures, which was shown along with the reported values1,2. (B) The temperature dependent DTA curves of C16H34 under different pressures measured on heating and cooling runs. Inset: The peak temperature under different pressures, which was shown along with the reported values.





**Supplementary Figure 6. The entropy change curves Δ*S*LS(T) purely due to the first-order liquid-solid phase transition calculated from the DTA curves.** The Δ*S*LS(T) curves under different pressuresforC18H38 (A) and C16H34 (B).

**

**

**Supplementary Figure 7. The calculated total entropy, *S*t(T).** *S*t(T) under different pressures calculated from Δ*S*LS(T) and the heat capacity for C18H38 (A) and C16H34 (B).

**

**

**Supplementary Figure 8. The irrevsible entropy change under different pressures, Δ*S*ir(T).** Δ*S*ir(T) under different pressures for C18H38 (A) and C16H34 (B).

**

**

**Supplementary Figure 9. The BC effect with and without considering the pressure effect on heat capacity (*C*p).** (A) The total entropy *S*t(T) with (gray curve, calculated by Δ*S*LS and *C*p under ambient pressure) and without (red curve, the real total entropy constructed by Δ*S*LS and *C*p under applied pressure) considering the pressure effect on the heat capacity. (B) The pressure induced entropy change based on the the total entropy with (gray curve) and without (red curve) considering the pressure effect on the heat capacity, respectively.

**

**

**Supplementary Figure 10. The enthalpy change at different pressures for C18H38 calculated by the normal one-phase MD methods.**





**Supplementary Figure 11. The theoretically obtained radial distribution function at different temperatures for C18H38.**

**Supplementary References**

1. R. R. Nelson, W. Webb, J. A. Dixon, First-order phase transition of six normal paraffins at elevated pressures. *J. Chem. Phys.* **3**, 1756-1764 (1960).

2. H. O. Baled, D. Xing, H. Katz, D. Tapriyal, I. K. Gamwo, Y. Soong, B. A. Bamgbade, Y. Wu, K. Liu, M. A. Mchugh, R. M. Enick, Viscosity n-Hexadecane, n-Octadecane and n-Eicosane at pressures up to 243MPa and temperature up to 534K. *J. Chem. Thermodynamics* **72**, 108-116 (2014).
